# Supplementary material for: Chondrocyte Thrombomodulin Protects against Osteoarthritis
Source: MDPI journal article supplement (doi:10.3390/ijms24119522), 2023-05-30

**Supplementary Figure S1. Immunohistochemical (IHC) staining was performed on articular cartilage sections obtained from both normal human subjects and patients with OA (osteoarthritis). Purchased sections were performed to IHC staining to evaluate the TM level of chondrocytes. Scar bar: 100  $\mu$ m.**

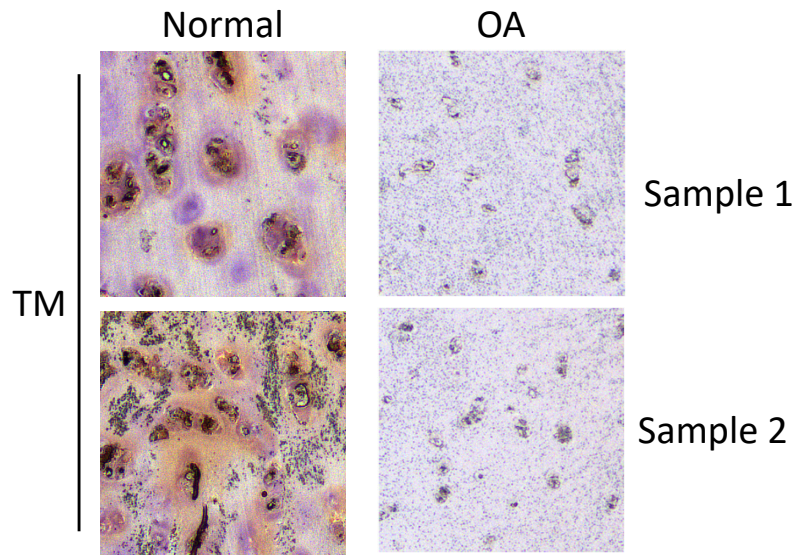

Supplement: s1 [file s1]
